# Supplementary material for: Production of 3D Printed Bi-Layer and Tri-Layer Sandwich Scaffolds with Polycaprolactone and Poly (vinyl alcohol)-Metformin towards Diabetic Wound Healing
Source: MDPI journal article supplement (doi:10.3390/polym14235306), 2022-12-05
Supplement: s1 [file s1]

*Supplementary information*

**Figure S1.** Standard curve for the Metformin

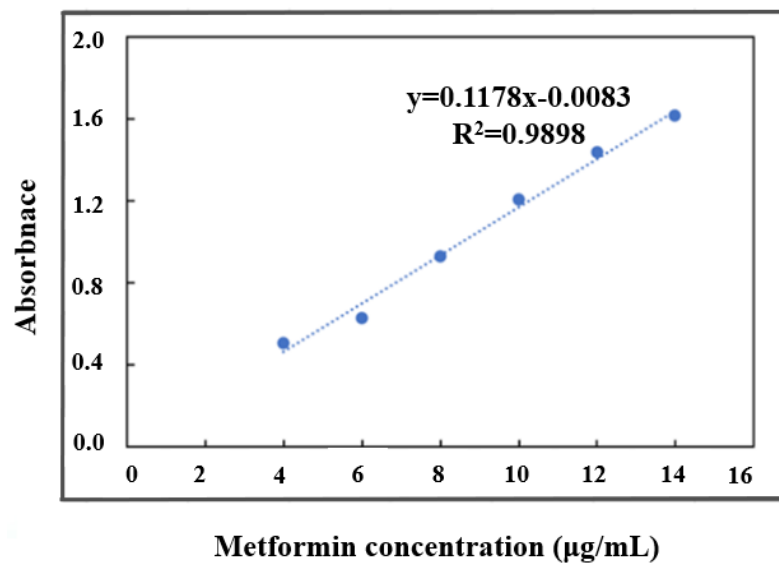

**Figure S1.** Standard curve for the Metformin.
